# Supplementary material for: Cohort profile: Copenhagen Hospital Biobank - Cardiovascular Disease Cohort (CHB-CVDC): Construction of a large-scale genetic cohort to facilitate a better understanding of heart diseases
Source: PubMed Central journal article supplement — BMJ Open. 2021 Dec 25;11(12):e049709. doi: 10.1136/bmjopen-2021-049709 (PMC8719218; doi:10.1136/bmjopen-2021-049709), 2021-12-25
Supplement: bmjopen-2021-049709supp001.pdf [file bmjopen-2021-049709supp001.pdf]

## 1 **Supplementary Material**

### 2 **Methods**

3 Descriptive statistics were presented as numbers, percentages, mean, medians and standard  
4 deviations. The patients were grouped according to their first cardiovascular diagnosis within the  
5 hospital admission ICD10 codes presented in Table 1 in the main document. If more than one diagnosis  
6 was given at the same day the A diagnosis, the primary cause of the health care contact, was used.

7 Charlson Comorbidity Index was calculated with the R package 'comorbidity'.<sup>[1]</sup> It is based on the  
8 Charlson score proposed by Quan et al. in 2005.<sup>[2]</sup> and includes the following comorbid conditions:  
9 acute myocardial infarction, congestive heart failure, peripheral vascular disease, cerebrovascular  
10 disease, dementia, chronic obstructive pulmonary disease [COPD], rheumatoid disease, peptic ulcer  
11 disease, mild and moderate/severe liver disease, diabetes mellitus with and without complications,  
12 hemiplegia/paraplegia, renal disease, cancer (any malignancy) and metastatic solid tumour, AIDS/HIV.  
13 ICD-8 codes were mapped to ICD-10 codes by an internal ICD-8 to ICD-10 mapping file. The diagnoses  
14 prior to the date of a patient's first cardiovascular disease, to inclusion date and end of follow-up or  
15 death were included in the Charlson Comorbidity Index calculations.

### 16 **Cases and controls**

17 In this study cases and controls were defined according to ICD10/ICD8 codes and prescription medicine  
18 from the National Patient Register and the Danish Prescription Database.<sup>[3,4]</sup> The population  
19 constitutes of participants from the Danish Blood Donor Study (n = 110 000) and patients from the  
20 Copenhagen Hospital Biobank - Cardiovascular Disease Cohort (CHB-CVDC) (n = 96 308).<sup>[5]</sup> A more  
21 detailed description of the phenotypes are presented below.

22 Phenotype descriptions is inspired by previously described phenotypes.<sup>[6,7]</sup>

### 23 **Heart Failure**

1 Hospitalization for ICD-10 code for heart failure (I50 and sub codes); or hospitalization for ICD-8 code  
2 for heart failure (42709, 42710, 42711, 42719, 78249).

### 3 **Coronary Artery Disease**

4 Hospitalization for ICD-10 code for coronary artery disease (I21, I22, I23, I24, I25); or hospitalization  
5 due to ICD-8 code for coronary artery disease (41199, 41099, 41409, 41499, 41299, 412909, 41009,  
6 41109).

### 7 **Atrial Fibrillation**

8 Hospitalization for ICD-10 code for atrial fibrillation or atrial flutter (I48); or hospitalization for ICD-8  
9 code for atrial fibrillation or atrial flutter (42793, 42794).

### 10 **Hypertension**

11 Hospitalization for ICD10 code for essential hypertension (I10), excluding following ICD10 codes from  
12 controls I11, I12, I13, I15; or hospitalization for ICD-8 code for essential hypertension (40009, 40299,  
13 40199); and use of at least one antihypertensive drug, the following ATC-codes included: Renin–  
14 angiotensin system inhibitors C09; calcium channel blockers C08; b-blockers C07; diuretics C03;  
15 antiadrenergic drugs C02A, C02B, and C02C; and other antihypertensives C02DA, C02DB, C02DD,  
16 C02DG, and C02L. Controls with prescriptions of beforementioned atc codes were removed from the  
17 control group.

### 18 **Cholesterol measurements**

19 A patient's first measure of High-Density Lipoprotein (HDL), Low-Density Lipoprotein (LDL),  
20 Triglycerides (TG) and Total Cholesterol (TC) were retrieved from the Danish Laboratory Database. The  
21 following NPU codes were used: NPU01567 (HDL), NPU01568 (LDL), NPU01566 (TC) and NPU04094  
22 (TG). The data for each NPU code used was checked for differences between laboratories.

## 1 **Inclusion of previously published genetic variants**

2 An extensive literature search was performed for each phenotype. The newest and most updated  
3 genome wide association study available, in the period this manuscript was written, of a given disease  
4 was included if it was published in English in a high impact peer reviewed journal and include  
5 populations of European ancestry. It was assumed that the most updated study was replicating  
6 previously found variants.

7 A genetic variant was included from the study if it was a significant independent variant and if minor  
8 allele frequency >1%. If a variant was not included in our dataset a proxy variant ( $R^2 > 0.8$ ) was used, if  
9 possible. LDlink proxy tool with European population as reference was used to find proxy variants.[8]

## 10 **Replication of included variants**

11 For coronary artery disease, atrial fibrillation, heart failure and essential hypertension, the association  
12 between the included variants and disease were calculated using a logistic mixed model implemented  
13 by SAIGE assuming an additive genetic model and adjusted for year of birth, sex and the first 10  
14 principal components (PCs) to correct for population structure. A variant was replicated if the effect  
15 size of the risk allele had the same direction of effect and a  $P < 0.05$  (Bonferroni adjusted).

16 For low-density lipoprotein, high density lipoprotein, total cholesterol and triglyceride, Bolt-LMM was  
17 used to calculate associations to disease. The patients first measurement values were inverse rank  
18 normalized and adjusted for age at measurement, place of measurement, lipid lowering medications  
19 (ATC – C10 within 180 days before measurement) and sex. Residuals were used as the independent  
20 variable in association analysis adjusted for year of birth and 10 PCs. Effect sizes were calculated by  
21 regressing variants to the inverse rank normalized measurement values adjusted for sex, age at  
22 measurement, year of birth, lipid lowering medication, significant places of measurements and 10  
23 PCs.

1 Effect sizes were retrieved from the included studies. Previously found effect sizes, risk allele  
2 frequencies and p-values were plotted against the obtained values from this study. Effect sizes were  
3 weighted by allele frequencies. Power calculations for each SNP were based on standard error and  
4 effect size and performed in R[9].

5 The following tools were used: PLINK 2[10,11], SAIGE 36.3.3[12], BOLT-LMM 2.3.4[13], flashpca  
6 2.0[14], LDlink[8], Python 3 , Rstudio 1.2.1335[15].

7

### 8 **Comparison of different study designs**

9 We evaluated the study designs with CHB-CVDC as the only controls and DBDS as the only controls  
10 respectively.

11 We employed LD Score regression to investigate residual confounding. Residual confounding was  
12 evaluated through the LD Score regression intercept and the attenuation ratio (the ratio between the  
13 intercept and the mean  $\chi^2$  statistic).[16] Genetic correlations were estimated using LD Score Regression  
14 with the 1000Genomes EUR v3 LD reference panel. Summary stats for a pre-selected list of phenotypes  
15 were retrieved from the GWAS catalog[17]. See Table 2 for a complete list.

16

1 **Supplementary Figures**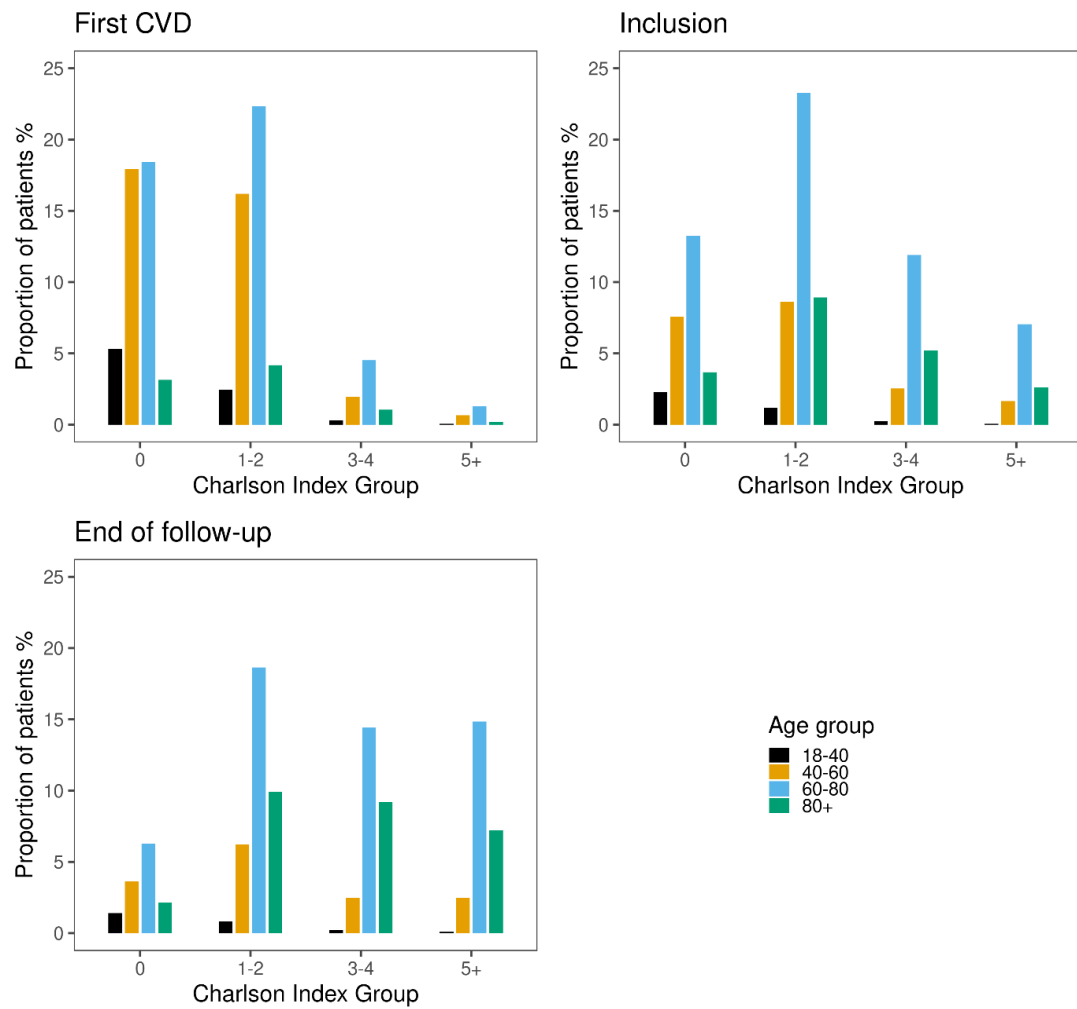

2

3 **Supplementary Figure 1: The patients in CHB-CVDC were classified by the Charlson Comorbidity Index prior to**  
 4 **the date of the first cardiovascular diagnosis, the inclusion date and at the end of follow-up or death. The**  
 5 **patients are stratified in age groups. CVD: cardiovascular disease**

6

1

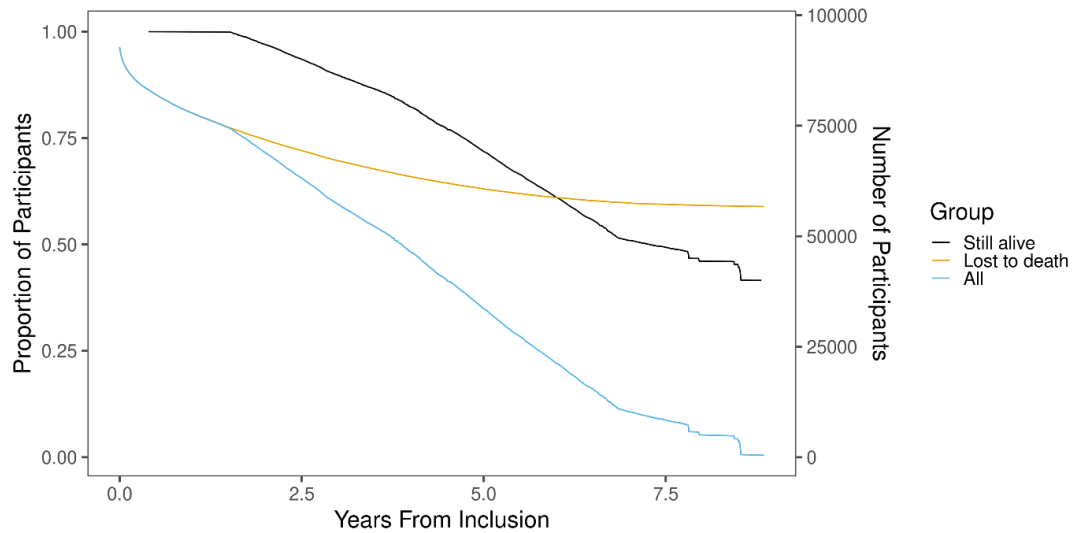

2

3 **Supplementary Figure 2: The follow-up time from inclusion to either death or present was plotted. When a**  
4 **patient was either dead or the data extraction date (present) was reached the patient is subtracted from the**  
5 **total number of individuals. The black line shows the follow-up time for those still alive at present (56 259).**  
6 **The yellow line shows the follow-up time for those who are dead (39 539). The blue line shows the total follow-**  
7 **up time. More patients die within the first two years and then the curve flattens. The irregular part in the end**  
8 **of the survivor curve corresponds to some delays in inclusion times from the start of inclusion in 2009.**

9

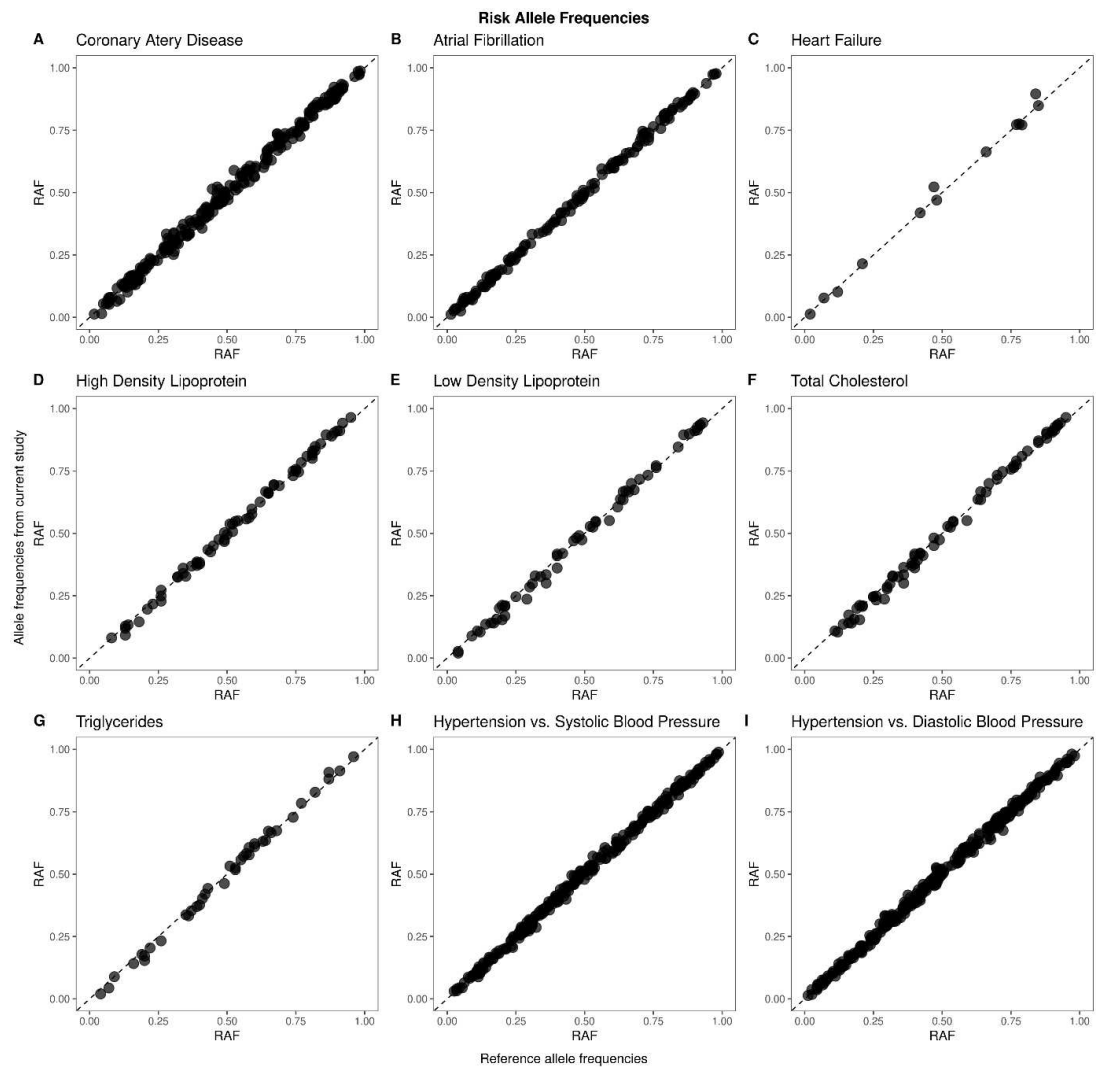

1

2 **Supplementary Figure 3: This figure shows the correlation between the risk allele frequencies between the**3 **reference studies and this work. The dotted lines are the expected correlations of 1.**

4

1

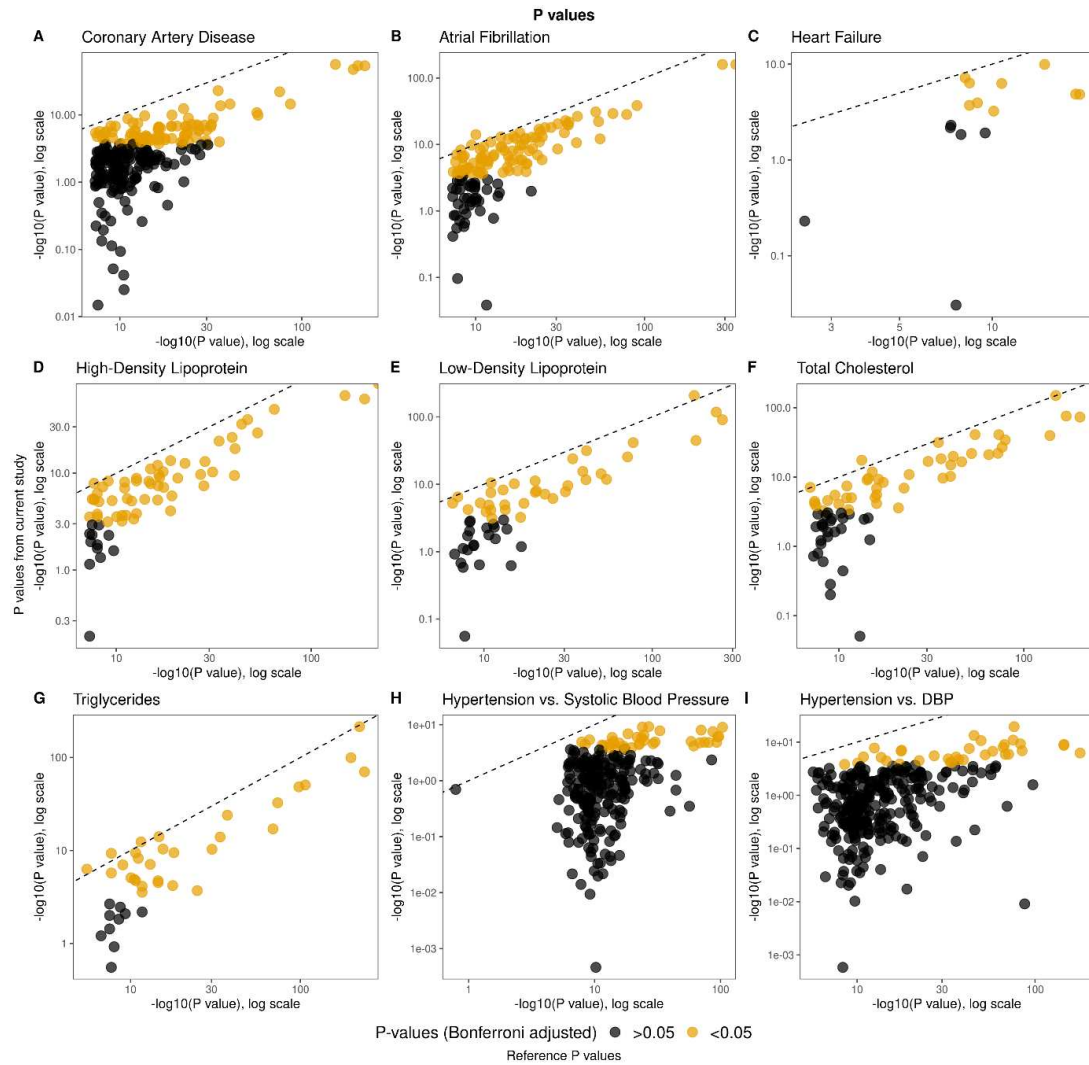

2

3 **Supplementary Figure 4: For each trait the  $-\log_{10}(p\text{-values})$  from this study were plotted against the  $-\log(p\text{-}$**   
 4 **values) from the reference studies. The axes are on logarithmic scales. The dotted lines correspond to a**  
 5 **correlation of 1.**

6

8



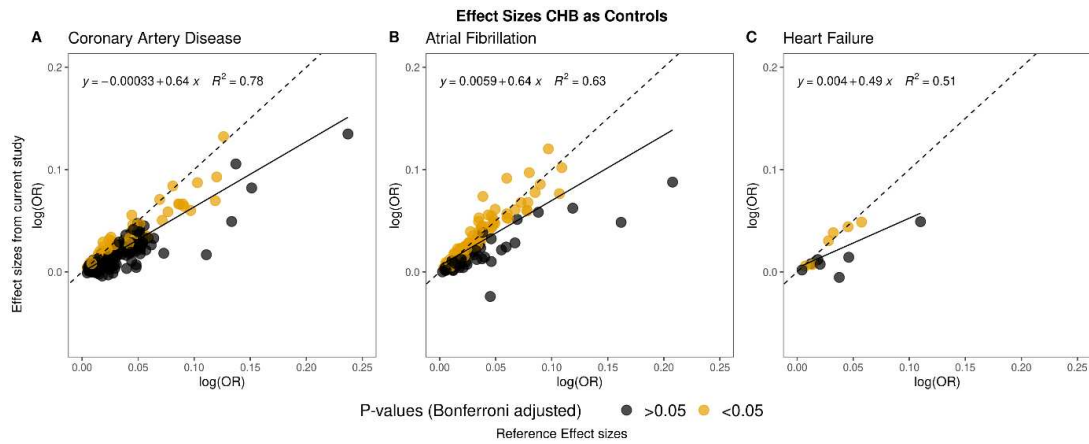

1  
2  
3  
4

**Supplementary Figure 5: Comparison of effect sizes between reference studies and the CHB-CVDC as controls study design.**

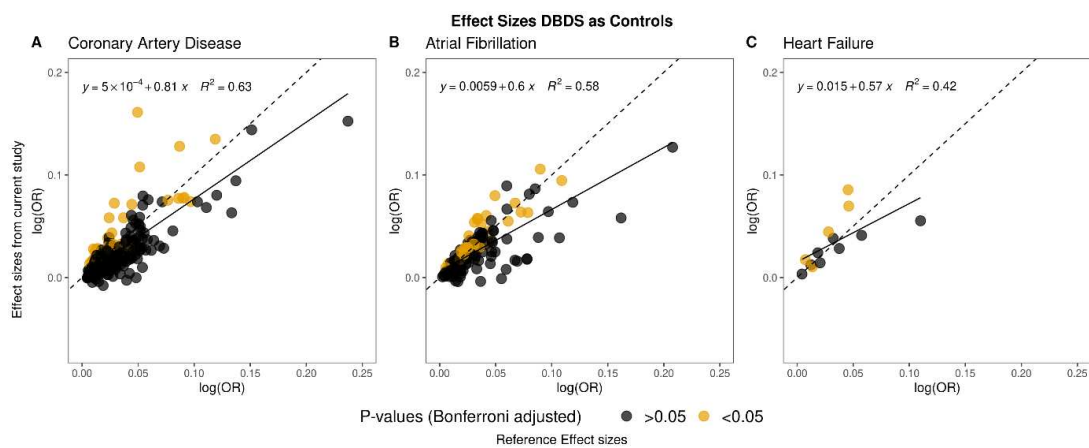

5  
6  
7

**Supplementary Figure 6: Comparison of effect sizes between reference studies and the DBDS as controls study design.**

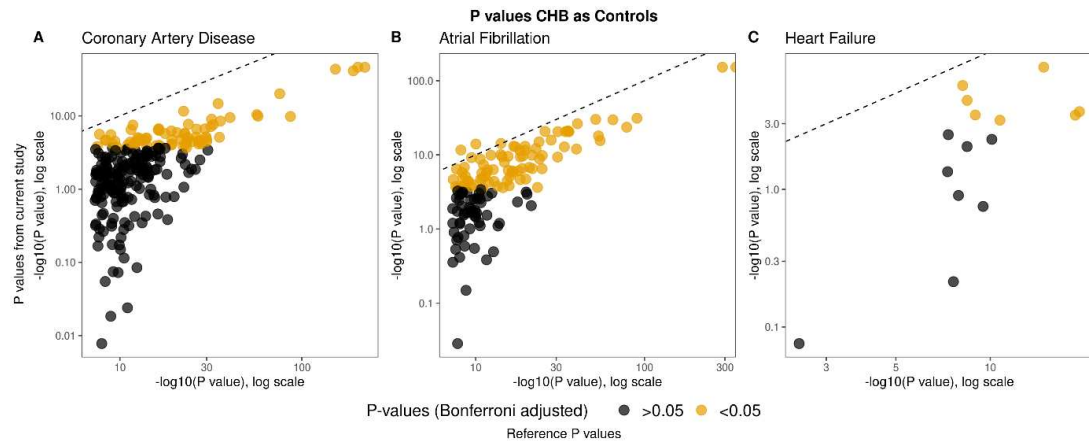

1

2 **Supplementary Figure 7: Comparison of p-values between reference studies and the CHB-CVDC as controls**

3 **study design.**

4

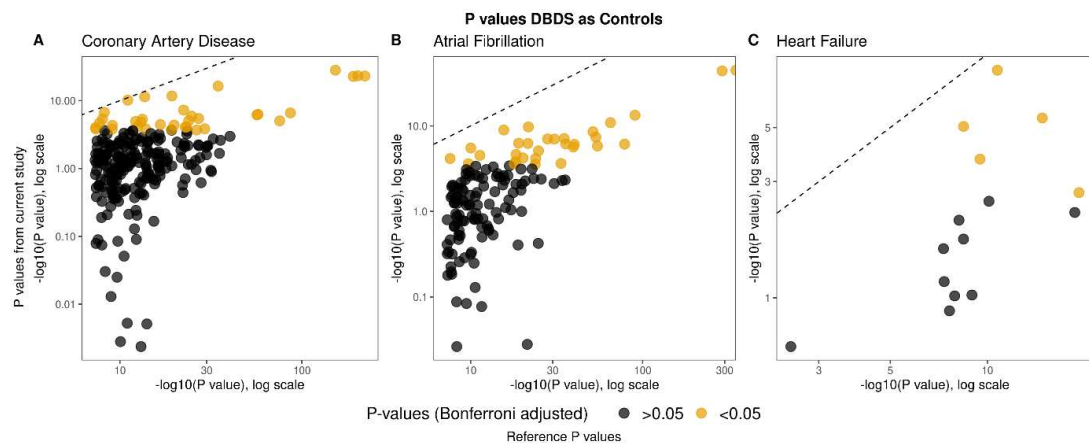

5

6 **Supplementary Figure 8: Comparison of p-values between reference studies and the DBDS as controls**

7 **study design.**

## Supplementary Tables

Supplementary Table 1: Population characteristics

|                                                                 | ICD-10 Codes                | N (% females) | Year of birth, Mean (SD) | Age at inclusion, Mean (SD) | Age at first CVD, Mean (SD) | Hemoglobin Complete % | Troponin T Complete % | Creatinine Complete % | CRP Complete % | LDL Complete % | HDL Complete % | Na <sup>+</sup> Complete % | K <sup>+</sup> Complete % |
|-----------------------------------------------------------------|-----------------------------|---------------|--------------------------|-----------------------------|-----------------------------|-----------------------|-----------------------|-----------------------|----------------|----------------|----------------|----------------------------|---------------------------|
| Hypertension and hypertensive cardiac diseases                  | I10-15                      | 29 546 (55%)  | 1943.8 (13.1)            | 69.6 (13.2)                 | 62.5 (14.3)                 | 98.97 %               | 21.54 %               | 98.26 %               | 97.35 %        | 85.02 %        | 89.90 %        | 98.99 %                    | 98.98 %                   |
| Coronary artery diseases and atherosclerosis                    | I20-25, I70                 | 24 795 (36%)  | 1943.6 (12.7)            | 69.5 (12.8)                 | 60.0 (12.4)                 | 98.48 %               | 37.27 %               | 97.67 %               | 96.64 %        | 87.49 %        | 90.78 %        | 98.57 %                    | 98.55 %                   |
| Lipid disorders                                                 | E78                         | 4046 (50%)    | 1948.3 (13.1)            | 65.2 (13.2)                 | 58.5 (13.8)                 | 98.91 %               | 20.27 %               | 98.15 %               | 97.21 %        | 90.29 %        | 94.07 %        | 98.84 %                    | 98.84 %                   |
| Cardiac arrhythmia                                              | I44-49                      | 16 208 (44%)  | 1945.5 (16.7)            | 67.9 (16.8)                 | 60.5 (17.2)                 | 98.65 %               | 22.77 %               | 97.80 %               | 96.99 %        | 80.81 %        | 85.48 %        | 98.53 %                    | 98.51 %                   |
| Heart failure, cardiac valve disorders, and myocardial diseases | I50, I34-39, I05-09, I40-44 | 7264 (41%)    | 1943.9 (16.1)            | 69.2 (16.2)                 | 62.5 (17.6)                 | 98.73 %               | 36.65 %               | 97.88 %               | 97.94 %        | 82.30 %        | 86.38 %        | 98.61 %                    | 98.61 %                   |
| Vascular disorders and aneurysms                                | I71-79                      | 3121 (40%)    | 1942.6 (12.2)            | 70.3 (12.3)                 | 62.3 (13.8)                 | 98.08 %               | 31.66 %               | 97.18 %               | 97.53 %        | 85.61 %        | 88.72 %        | 98.17 %                    | 98.14 %                   |
| Cerebrovascular diseases and cerebral hemorrhage                | I60-69                      | 8401 (44%)    | 1941.1 (12.2)            | 72.1 (12.4)                 | 63.1 (13.2)                 | 98.76 %               | 23.90 %               | 97.74 %               | 97.82 %        | 85.69 %        | 89.85 %        | 98.70 %                    | 98.68 %                   |
| Pulmonary heart and pulmonary circulation diseases              | I26-28                      | 1521 (49%)    | 1942.4 (13.6)            | 70.7 (13.8)                 | 59.7 (15.8)                 | 98.75 %               | 31.62 %               | 98.09 %               | 97.50 %        | 81.53 %        | 87.44 %        | 98.69 %                    | 98.69 %                   |
| Vascular kidney disease                                         | N17-19                      | 1406 (39%)    | 1945.2 (14.2)            | 67.4 (14.4)                 | 61.0 (16.9)                 | 98.44 %               | 26.53 %               | 97.51 %               | 98.08 %        | 79.16 %        | 83.85 %        | 98.44 %                    | 98.36 %                   |
| Above diseases combined                                         |                             | 96 308 (45%)  | 1943.9 (13.9)            | 69.3 (14.0)                 | 61.3 (14.5)                 | 98.71 %               | 27.65 %               | 97.90 %               | 97.21 %        | 84.90 %        | 89.12 %        | 98.71 %                    | 98.69 %                   |

N: Number of cases, SD: Standard Deviation, CRP: C-Reactive Protein, LDL: Low Density Lipoprotein, HDL: High Density Lipoprotein, Na<sup>+</sup>: Sodium ion, K<sup>+</sup>: Potassium ion

Supplementary Table 2: Charlson Comorbidity Index

| Charlson index calculated at first cardiovascular diagnosis |        |        |      |      |        |
|-------------------------------------------------------------|--------|--------|------|------|--------|
| sex                                                         | 0      | 1-2    | 3-4  | >=5  | total  |
| Counts                                                      | 43 130 | 43 506 | 7520 | 2152 | 96 308 |

|   |        |        |      |      |
|---|--------|--------|------|------|
| M | 22 287 | 24 845 | 3956 | 1185 |
| F | 22 843 | 18 661 | 3564 | 967  |

---

|            |    |    |   |   |
|------------|----|----|---|---|
| % of total | 45 | 45 | 8 | 2 |
|------------|----|----|---|---|

|   |    |    |    |    |
|---|----|----|----|----|
| M | 52 | 57 | 53 | 55 |
| F | 53 | 43 | 47 | 45 |

---

**Charlson index calculated at inclusion**

| sex | 0 | 1-2 | 3-4 | >=5 | total |
|-----|---|-----|-----|-----|-------|
|-----|---|-----|-----|-----|-------|

|        |        |        |        |        |        |
|--------|--------|--------|--------|--------|--------|
| Counts | 25 745 | 40 361 | 19 070 | 10 913 | 96 089 |
|--------|--------|--------|--------|--------|--------|

|   |        |        |        |      |
|---|--------|--------|--------|------|
| M | 13 213 | 22 102 | 10 735 | 6616 |
| F | 12 532 | 18 259 | 8335   | 4297 |

---

|            |    |    |    |    |
|------------|----|----|----|----|
| % of total | 27 | 42 | 20 | 11 |
|------------|----|----|----|----|

|   |    |    |    |    |
|---|----|----|----|----|
| M | 51 | 55 | 56 | 61 |
| F | 49 | 45 | 44 | 39 |

---

**Charlson index calculated at the end of follow up**

| sex | 0 | 1-2 | 3-4 | >=5 | total |
|-----|---|-----|-----|-----|-------|
|-----|---|-----|-----|-----|-------|

|        |        |        |        |        |        |
|--------|--------|--------|--------|--------|--------|
| Counts | 12 977 | 34 375 | 25 300 | 23 656 | 96 308 |
|--------|--------|--------|--------|--------|--------|

|   |      |        |        |        |
|---|------|--------|--------|--------|
| M | 6878 | 18 258 | 14 045 | 14 427 |
| F | 6099 | 16 117 | 11 255 | 9229   |

---

|            |    |    |    |    |
|------------|----|----|----|----|
| % of total | 13 | 36 | 26 | 25 |
|------------|----|----|----|----|

|   |    |    |    |    |
|---|----|----|----|----|
| M | 53 | 53 | 56 | 61 |
| F | 47 | 47 | 44 | 39 |

---

**Supplementary Table 3: An overview of diagnosis assigned prior to the first cardiovascular disease. If a patient has received multiple diagnosis within a ICD10 chapter they were only counted as one diagnosis. E.g 5 465 have a digestive disorder prior to a cardiac arrhythmia diagnosis as their first cardiovascular disease.**

| First assigned cardiovascular diagnosis                        | -   | Certain conditions originating in the perinatal period | Certain infections and parasitic diseases | Codes for special purposes | Congenital malformations, deformations and chromosomal abnormalities | Diseases of the blood and blood-forming organs and certain disorders involving the immune mechanism | Diseases of the circulatory system included in CHB-CVDC | Diseases of the circulatory system included in CHB-CVDC diagnosed the same day |
|----------------------------------------------------------------|-----|--------------------------------------------------------|-------------------------------------------|----------------------------|----------------------------------------------------------------------|-----------------------------------------------------------------------------------------------------|---------------------------------------------------------|--------------------------------------------------------------------------------|
| Cardiac arrhythmia                                             | 0   | 236                                                    | 2187                                      | 133                        | 688                                                                  | 837                                                                                                 | 16208                                                   | 2039                                                                           |
| Cerebrovascular diseases and cerebral haemorrhage              | 0   | 16                                                     | 855                                       | 45                         | 266                                                                  | 296                                                                                                 | 8401                                                    | 2672                                                                           |
| Heart failure, cardiac valve disorders and myocardial diseases | 0   | 118                                                    | 1058                                      | 43                         | 467                                                                  | 474                                                                                                 | 7264                                                    | 1639                                                                           |
| Hypertensive cardiac diseases                                  | <10 | 139                                                    | 3867                                      | 273                        | 1049                                                                 | 1722                                                                                                | 29546                                                   | 2176                                                                           |
| Ischemic heart diseases and atherosclerosis                    | 0   | 80                                                     | 2435                                      | 176                        | 726                                                                  | 711                                                                                                 | 24795                                                   | 4319                                                                           |
| Lipid disorders                                                | 0   | 42                                                     | 547                                       | 52                         | 160                                                                  | 188                                                                                                 | 4046                                                    | 1185                                                                           |
| Pulmonary heart diseases                                       | 0   | <10                                                    | 202                                       | <10                        | 64                                                                   | 88                                                                                                  | 1521                                                    | 232                                                                            |
| Vascular disorders and aneurysms                               | 0   | 12                                                     | 359                                       | 17                         | 127                                                                  | 129                                                                                                 | 3121                                                    | 307                                                                            |
| Vascular kidney diseases                                       | 0   | 12                                                     | 394                                       | 13                         | 107                                                                  | 215                                                                                                 | 1406                                                    | 323                                                                            |

**Supplementary Table 3 continued:**

| First assigned cardiovascular diagnosis                        | Diseases of the circulatory system not included in CHB-CVDC | Diseases of the digestive system | Diseases of the eye and adnexa, Diseases of the ear and mastoid process | Diseases of the genitourinary system | Diseases of the musculoskeletal system and connective tissue | Diseases of the nervous system | Diseases of the respiratory system | Diseases of the skin and subcutaneous tissue |
|----------------------------------------------------------------|-------------------------------------------------------------|----------------------------------|-------------------------------------------------------------------------|--------------------------------------|--------------------------------------------------------------|--------------------------------|------------------------------------|----------------------------------------------|
| Cardiac arrhythmia                                             | 1751                                                        | 5465                             | 4294                                                                    | 4973                                 | 6296                                                         | 2145                           | 4258                               | 1836                                         |
| Cerebrovascular diseases and cerebral haemorrhage              | 682                                                         | 2635                             | 2252                                                                    | 2495                                 | 3033                                                         | 1941                           | 1556                               | 898                                          |
| Heart failure, cardiac valve disorders and myocardial diseases | 1083                                                        | 2589                             | 2183                                                                    | 2175                                 | 2876                                                         | 973                            | 2188                               | 878                                          |
| Hypertensive cardiac diseases                                  | 3177                                                        | 11929                            | 8869                                                                    | 11674                                | 13411                                                        | 4777                           | 7100                               | 3914                                         |
| Ischemic heart diseases and atherosclerosis                    | 2180                                                        | 7983                             | 5281                                                                    | 6903                                 | 9721                                                         | 2809                           | 4803                               | 2825                                         |
| Lipid disorders                                                | 442                                                         | 1665                             | 1138                                                                    | 1492                                 | 1976                                                         | 1015                           | 913                                | 635                                          |
| Pulmonary heart diseases                                       | 428                                                         | 505                              | 346                                                                     | 506                                  | 604                                                          | 189                            | 524                                | 164                                          |
| Vascular disorders and aneurysms                               | 356                                                         | 1128                             | 829                                                                     | 920                                  | 1308                                                         | 401                            | 665                                | 399                                          |
| Vascular kidney diseases                                       | 191                                                         | 597                              | 442                                                                     | 675                                  | 608                                                          | 218                            | 499                                | 233                                          |

Supplementary Table 3 continued:

| First assigned cardiovascular diagnosis                        | Endocrine, nutritional and metabolic diseases | External causes of morbidity and mortality | Factors influencing health status and contact with health services | Injury, poisoning and certain other consequences of external causes | Mental and behavioural disorders | Neoplasms | Pregnancy, childbirth and the puerperium | Symptoms, signs and abnormal clinical and laboratory findings, not elsewhere classified |
|----------------------------------------------------------------|-----------------------------------------------|--------------------------------------------|--------------------------------------------------------------------|---------------------------------------------------------------------|----------------------------------|-----------|------------------------------------------|-----------------------------------------------------------------------------------------|
| Cardiac arrhythmia                                             | 2452                                          | 194                                        | 11302                                                              | 10193                                                               | 2253                             | 4158      | 1963                                     | 6539                                                                                    |
| Cerebrovascular diseases and cerebral haemorrhage              | 1286                                          | 78                                         | 5487                                                               | 4910                                                                | 1305                             | 1873      | 887                                      | 3121                                                                                    |
| Heart failure, cardiac valve disorders and myocardial diseases | 1232                                          | 66                                         | 5254                                                               | 4440                                                                | 1019                             | 1783      | 663                                      | 3050                                                                                    |
| Hypertensive cardiac diseases                                  | 8609                                          | 574                                        | 21820                                                              | 18895                                                               | 4786                             | 10230     | 4765                                     | 12924                                                                                   |
| Ischemic heart diseases and atherosclerosis                    | 3223                                          | 184                                        | 15421                                                              | 14076                                                               | 2905                             | 4890      | 2417                                     | 8150                                                                                    |
| Lipid disorders                                                | 1584                                          | 78                                         | 3129                                                               | 2728                                                                | 742                              | 1254      | 742                                      | 1820                                                                                    |
| Pulmonary heart diseases                                       | 198                                           | 15                                         | 935                                                                | 868                                                                 | 206                              | 427       | 189                                      | 566                                                                                     |
| Vascular disorders and aneurysms                               | 391                                           | 19                                         | 2180                                                               | 1924                                                                | 409                              | 745       | 297                                      | 1110                                                                                    |
| Vascular kidney diseases                                       | 493                                           | 21                                         | 1032                                                               | 887                                                                 | 280                              | 449       | 140                                      | 694                                                                                     |

**Supplementary Table 4: Patients in CHB-CVDC were grouped according to their first cardiovascular disease. The number of patients with diagnoses within the other cardiovascular diseases were calculated. If a patient has received multiple diagnoses within a disease group, they were only counted as one diagnosis. E.g. 2 403 patients receive a cardiac arrhythmia diagnosis as their first cardiovascular disease and later in life one or more diagnoses within the group cerebrovascular diseases and cerebral haemorrhage.**

| First assigned cardiovascular diagnosis                        | Cardiac arrhythmia | Cerebrovascular diseases and cerebral haemorrhage | Heart failure, cardiac valve disorders and myocardial diseases | Hypertensive cardiac diseases | Ischemic heart diseases and atherosclerosis | Lipid disorders | Pulmonary heart diseases | Vascular disorders and aneurysms | Vascular kidney diseases |
|----------------------------------------------------------------|--------------------|---------------------------------------------------|----------------------------------------------------------------|-------------------------------|---------------------------------------------|-----------------|--------------------------|----------------------------------|--------------------------|
| Cardiac arrhythmia                                             | 0                  | 2403                                              | 4630                                                           | 6610                          | 4274                                        | 2334            | 747                      | 1245                             | 1421                     |
| Cerebrovascular diseases and cerebral haemorrhage              | 2897               | 0                                                 | 2126                                                           | 6203                          | 2931                                        | 4050            | 431                      | 1205                             | 1050                     |
| Heart failure, cardiac valve disorders and myocardial diseases | 3187               | 1077                                              | 0                                                              | 3448                          | 2844                                        | 1634            | 419                      | 877                              | 1078                     |
| Hypertensive cardiac diseases                                  | 6751               | 4951                                              | 5523                                                           | 0                             | 7110                                        | 6419            | 1367                     | 2877                             | 3821                     |
| Ischemic heart diseases and atherosclerosis                    | 7778               | 4257                                              | 8639                                                           | 13777                         | 0                                           | 10581           | 1328                     | 4696                             | 2907                     |
| Lipid disorders                                                | 699                | 672                                               | 637                                                            | 2128                          | 1062                                        | 0               | 149                      | 383                              | 352                      |
| Pulmonary heart diseases                                       | 674                | 276                                               | 574                                                            | 945                           | 638                                         | 331             | 0                        | 194                              | 212                      |
| Vascular disorders and aneurysms                               | 1055               | 654                                               | 967                                                            | 2081                          | 1911                                        | 944             | 206                      | 0                                | 493                      |
| Vascular kidney diseases                                       | 558                | 255                                               | 432                                                            | 989                           | 467                                         | 251             | 80                       | 207                              | 0                        |



**Supplementary Table 5: Top 100 diagnosis in CHB-CVDC**

|    | ICD10 code | Number of patients with diagnosis | Medical condition                                              |
|----|------------|-----------------------------------|----------------------------------------------------------------|
| 1  | I109       | 64 247                            | Essential hypertension, unspecified                            |
| 2  | I489       | 27 315                            | Atrial fibrillation and flutter, unspecified                   |
| 3  | E780       | 26 581                            | Hypercholesterolemia                                           |
| 4  | I259       | 22 305                            | Chronic ischemic heart disease, unspecified                    |
| 5  | I209       | 21 409                            | Angina pectoris, unspecified                                   |
| 6  | I509       | 18 294                            | Heart failure, unspecified                                     |
| 7  | I251       | 12 825                            | Atherosclerotic heart disease                                  |
| 8  | I649       | 11 272                            | Apoplexia cerebri, unspecified                                 |
| 9  | I639       | 11 076                            | Cerebral infarction, unspecified                               |
| 10 | I219       | 10 383                            | Acute myocardial infarction, unspecified                       |
| 11 | I694       | 9972                              | Sequelae of stroke, not specified as haemorrhage or infarction |
| 12 | I489B      | 8639                              | Atrial fibrillation and atrial flutter, unspecified            |
| 13 | I252       | 8611                              | Old myocardial infarction                                      |
| 14 | I214       | 8486                              | Acute subendocardial myocardial infarction                     |
| 15 | I200       | 7801                              | Unstable angina                                                |
| 16 | I500       | 7536                              | Congestive heart failure                                       |
| 17 | N189       | 7256                              | Chronic kidney disease, unspecified                            |
| 18 | I350       | 7242                              | Aortic (valve) stenosis                                        |
| 19 | I702       | 6920                              | Atherosclerosis of arteries of extremities                     |
| 20 | E785       | 6864                              | Hyperlipidaemia, unspecified                                   |
| 21 | I739A      | 6122                              | Intermittent claudication                                      |
| 22 | I471       | 5356                              | Supraventricular tachycardia                                   |
| 23 | N179       | 5158                              | Acute renal failure, unspecified                               |
| 24 | I480       | 4917                              | Paroxysmal atrial fibrillation                                 |
| 25 | I213       | 4182                              | Acute transmural myocardial infarction of unspecified site     |
| 26 | N199       | 3964                              | Unspecified kidney failure                                     |
| 27 | I501       | 3829                              | Left ventricular failure                                       |
| 28 | I482       | 3423                              | Chronic atrial fibrillation                                    |
| 29 | I693       | 3216                              | Sequelae of cerebral infarction                                |
| 30 | I269       | 2982                              | Pulmonary embolism without mention of acute cor pulmonale      |
| 31 | I709       | 2967                              | Generalized and unspecified atherosclerosis                    |
| 32 | I340       | 2931                              | Mitral (valve) insufficiency                                   |
| 33 | I739C      | 2929                              | Peripheral vascular disease, unspecified +                     |
| 34 | I714       | 2919                              | Abdominal aortic aneurysm, without mention of rupture          |
| 35 | I702A      | 2651                              | Atherosclerotic gangrene                                       |
| 36 | I499       | 2622                              | Cardiac arrhythmia, unspecified                                |
| 37 | I442       | 2473                              | Atrioventricular block, complete                               |
| 38 | I10        | 2294                              | Essential (primary) hypertension                               |
| 39 | I351       | 2288                              | Aortic (valve) insufficiency                                   |
| 40 | I460       | 2167                              | Cardiac arrest with successful resuscitation                   |

|    |        |      |                                                                 |
|----|--------|------|-----------------------------------------------------------------|
| 41 | I269A  | 2155 | Pulmonary embolism NOS                                          |
| 42 | I119   | 2121 | Hypertensive heart disease without (congestive) heart failure   |
| 43 | I469   | 2108 | Cardiac arrest, unspecified                                     |
| 44 | I159   | 2107 | Secondary hypertension, unspecified                             |
| 45 | I479   | 2094 | Paroxysmal tachycardia, unspecified                             |
| 46 | I619   | 1979 | Intracerebral haemorrhage, unspecified                          |
| 47 | I208   | 1977 | Other forms of angina pectoris                                  |
| 48 | I493   | 1890 | Ventricular premature depolarization                            |
| 49 | I489BB | 1876 | Atrial fibrillation and atrial flutter, unspecified             |
| 50 | I210   | 1860 | Acute transmural myocardial infarction of anterior wall         |
| 51 | I258   | 1762 | Other forms of chronic ischaemic heart disease                  |
| 52 | I489A  | 1670 | Atrial fibrillation and atrial flutter, unspecified             |
| 53 | I652   | 1609 | Occlusion and stenosis of carotid artery                        |
| 54 | I495   | 1579 | Sick sinus syndrome                                             |
| 55 | I481   | 1477 | Persistent atrial fibrillation                                  |
| 56 | I359   | 1469 | Aortic valve disorder, unspecified                              |
| 57 | I249   | 1465 | Acute ischaemic heart disease, unspecified                      |
| 58 | I472   | 1454 | Ventricular tachycardia                                         |
| 59 | I420   | 1442 | Dilated cardiomyopathy                                          |
| 60 | I211B  | 1350 | Acute transmural myocardial infarction of inferior wall         |
| 61 | I429   | 1332 | Cardiomyopathy, unspecified                                     |
| 62 | I211   | 1319 | Acute transmural myocardial infarction of inferior wall         |
| 63 | I110   | 1304 | Hypertensive heart disease with (congestive) heart failure      |
| 64 | I210B  | 1162 | Acute transmural myocardial infarction of anterior wall         |
| 65 | I491   | 1143 | Atrial premature depolarization                                 |
| 66 | N185   | 1137 | Chronic kidney disease, stage 5                                 |
| 67 | I739   | 1086 | Peripheral vascular disease, unspecified                        |
| 68 | I609   | 1061 | Subarachnoid haemorrhage, unspecified                           |
| 69 | I633   | 1047 | Cerebral infarction due to thrombosis of cerebral arteries      |
| 70 | N180   | 1025 | Hypertensive renal disease                                      |
| 71 | I719   | 969  | Aortic aneurysm of unspecified site, without mention of rupture |
| 72 | I743   | 948  | Embolism and thrombosis of arteries of lower extremities        |
| 73 | I495B  | 946  | Tachycardia-bradycardia syndrome                                |
| 74 | I255   | 919  | Ischaemic cardiomyopathy                                        |
| 75 | I201   | 856  | Angina pectoris with documented spasm                           |
| 76 | I712   | 853  | Thoracic aortic aneurysm, without mention of rupture            |
| 77 | I389   | 811  | Endocarditis, unspecified                                       |
| 78 | I501C  | 791  | Left ventricular failure, pulmonary congestion                  |
| 79 | I443   | 784  | Other and unspecified atrioventricular block                    |
| 80 | E782   | 768  | Mixed hyperlipidaemia                                           |
| 81 | E789   | 767  | Disorder of lipoprotein metabolism, unspecified                 |
| 82 | I270   | 751  | Other adrenocortical overactivity                               |
| 83 | I48    | 744  | Atrial fibrillation and flutter                                 |
| 84 | I279   | 740  | Pulmonary heart disease, unspecified                            |

|     |       |     |                                                                                      |
|-----|-------|-----|--------------------------------------------------------------------------------------|
| 85  | I691  | 721 | Sequelae of intracerebral haemorrhage                                                |
| 86  | I708  | 705 | Atherosclerosis of other arteries                                                    |
| 87  | I441  | 678 | Atrioventricular block, second degree                                                |
| 88  | I21   | 673 | Acute myocardial infarction                                                          |
| 89  | E780B | 651 | Familial hypercholesterolaemia                                                       |
| 90  | I632  | 649 | Cerebral infarction due to unspecified occlusion or stenosis of precerebral arteries |
| 91  | I472A | 627 | Ventricular tachycardia                                                              |
| 92  | I612  | 623 | Intracerebral haemorrhage in hemisphere, unspecified                                 |
| 93  | I501B | 615 | Left ventricular failure, Oedema of lung                                             |
| 94  | I470  | 598 | Re-entry ventricular arrhythmia                                                      |
| 95  | I352  | 589 | Aortic (valve) stenosis with insufficiency                                           |
| 96  | N183  | 585 | Chronic kidney disease, stage 3                                                      |
| 97  | I471R | 577 | Supraventricular tachycardia, atrioventricular [AV]: re-entrant (nodal) [AVNRT]      |
| 98  | I728  | 567 | Aneurysm and dissection of other specified arteries                                  |
| 99  | N184  | 566 | Chronic kidney disease, stage 4                                                      |
| 100 | N178  | 561 | Other acute renal failure                                                            |

**Supplementary Table 6: Overview of causes of death in CHB-CVDC according to the Danish Registry of Causes of Death**

| <b>Cause of death</b>                                                                                      | <b>n</b> | <b>% of dead</b> |
|------------------------------------------------------------------------------------------------------------|----------|------------------|
| <i>Cancer</i>                                                                                              | 13715    | 35.8             |
| <i>Heart disease</i>                                                                                       | 6478     | 16.9             |
| <i>Respiratory disease</i>                                                                                 | 3937     | 10.3             |
| <i>Other diseases in the circulatory system</i>                                                            | 3097     | 8.1              |
| <i>Diseases of the digestive system</i>                                                                    | 2019     | 5.3              |
| <i>Endocrine, nutritional, and metabolic diseases</i>                                                      | 1427     | 3.7              |
| <i>Unknown medical information</i>                                                                         | 1185     | 3.1              |
| <i>Mental and behavioural disorders</i>                                                                    | 1102     | 2.9              |
| <i>Diseases of the nervous system</i>                                                                      | 946      | 2.5              |
| <i>Accidents</i>                                                                                           | 917      | 2.4              |
| <i>Certain infectious and parasitic diseases</i>                                                           | 885      | 2.3              |
| <i>Diseases of the genitourinary system</i>                                                                | 799      | 2.1              |
| <i>Symptoms, signs, and abnormal clinical and laboratory findings, not elsewhere classified</i>            | 644      | 1.7              |
| <i>Neoplasms</i>                                                                                           | 288      | 0.8              |
| <i>Diseases of the musculoskeletal system and connective tissue</i>                                        | 262      | 0.7              |
| <i>Diseases of the blood and blood-forming organs and certain disorders involving the immune mechanism</i> | 212      | 0.6              |
| <i>Suicide</i>                                                                                             | 175      | 0.5              |
| <i>Diseases of the skin and subcutaneous tissue</i>                                                        | 69       | 0.2              |
| <i>Congenital malformations, deformations, and chromosomal abnormalities</i>                               | 65       | 0.2              |
| <i>Other causes</i>                                                                                        | 27       | 0.1              |

**Supplementary Table 7: Overview of databases and variables**

| <b>Databases</b>                                                                 | <b>Variables</b>                                                                                                                                                                                                                                                                                                                                                                                                                                                                                                                                                                                                                                                                                                                                                                                                                                                                                                                                                                                                                                                                                                                                                                                                 |
|----------------------------------------------------------------------------------|------------------------------------------------------------------------------------------------------------------------------------------------------------------------------------------------------------------------------------------------------------------------------------------------------------------------------------------------------------------------------------------------------------------------------------------------------------------------------------------------------------------------------------------------------------------------------------------------------------------------------------------------------------------------------------------------------------------------------------------------------------------------------------------------------------------------------------------------------------------------------------------------------------------------------------------------------------------------------------------------------------------------------------------------------------------------------------------------------------------------------------------------------------------------------------------------------------------|
| The National Patient Registry                                                    | ICD10/ICD8, SKS codes. Patient type, hospital code, department code, admission date, admission time, discharge date, discharge time, days of treatment, mode of admission, reason for contact, mode of discharge, speciality, action diagnosis, accident code, accident code counterpart, accident code case, accident code activity, accident code place, accident code mechanism, accident code traffic, outpatient date, diagnosis, type of diagnosis, additional diagnosis, diagnosis modification, SKS procedure (operation), SKS procedure classification (operation), additional code (operation), procedure hospital (operation), procedure department (operation), procedure day (operation), procedure hour (operation), procedure minute (operation), SKS procedure (diagnosis and treatment), SKS procedure classification (diagnosis and treatment), additional code (diagnosis and treatment), procedure hospital (diagnosis and treatment), procedure department (diagnosis and treatment), procedure day (diagnosis and treatment), procedure hour (diagnosis and treatment), procedure minute (diagnosis and treatment), and other similar variables that are needed for these classifications. |
| The Danish Registry of Causes of Death                                           | Date of death, cause of death, place of death.                                                                                                                                                                                                                                                                                                                                                                                                                                                                                                                                                                                                                                                                                                                                                                                                                                                                                                                                                                                                                                                                                                                                                                   |
| Central Person Registry (CPR)                                                    | Status (dead, emigrated or living) and also relatedness between cases.                                                                                                                                                                                                                                                                                                                                                                                                                                                                                                                                                                                                                                                                                                                                                                                                                                                                                                                                                                                                                                                                                                                                           |
| The Danish National Prescription Registry                                        | Medicine bought in pharmacies with prescription                                                                                                                                                                                                                                                                                                                                                                                                                                                                                                                                                                                                                                                                                                                                                                                                                                                                                                                                                                                                                                                                                                                                                                  |
| BigTempHealth                                                                    | Validate diagnoses and drug prescriptions. Include data from electronic health records (EHRs) and laboratory test results in the phenotypic characterization.                                                                                                                                                                                                                                                                                                                                                                                                                                                                                                                                                                                                                                                                                                                                                                                                                                                                                                                                                                                                                                                    |
| Danish Agency of Labour Market and Recruitment                                   | Working history and occupation                                                                                                                                                                                                                                                                                                                                                                                                                                                                                                                                                                                                                                                                                                                                                                                                                                                                                                                                                                                                                                                                                                                                                                                   |
| Health Care Statistics Registry                                                  | Speciality, service code, year, month, number of services to access risk factors for heart diseases. This also includes data on dental diseases and treatments to access dental risk factors for heart disease.                                                                                                                                                                                                                                                                                                                                                                                                                                                                                                                                                                                                                                                                                                                                                                                                                                                                                                                                                                                                  |
| The Danish Laboratory Database                                                   | Patient CPR, sampling date, sampling time, analysis code, Laboratory ID-CODE, value, unit, result type, reference interval upper limit, reference interval lower limit, and NPU code.                                                                                                                                                                                                                                                                                                                                                                                                                                                                                                                                                                                                                                                                                                                                                                                                                                                                                                                                                                                                                            |
| The Copenhagen GP Laboratory database                                            | Electrocardiography data                                                                                                                                                                                                                                                                                                                                                                                                                                                                                                                                                                                                                                                                                                                                                                                                                                                                                                                                                                                                                                                                                                                                                                                         |
| The Regions imaging data, including data in IntelliSpace, PACS and in Xeroviewer | Echocardiography, computer tomography (CT), Magnetic Resonans (MR), imaging, coronary arteriography, and nuclear imaging.                                                                                                                                                                                                                                                                                                                                                                                                                                                                                                                                                                                                                                                                                                                                                                                                                                                                                                                                                                                                                                                                                        |

|                                                     |                                                                                                                                                                                                                                                                                                                                                                                                                                                                                                                                              |
|-----------------------------------------------------|----------------------------------------------------------------------------------------------------------------------------------------------------------------------------------------------------------------------------------------------------------------------------------------------------------------------------------------------------------------------------------------------------------------------------------------------------------------------------------------------------------------------------------------------|
| The Regions ECG and Holter database; Kardia         |                                                                                                                                                                                                                                                                                                                                                                                                                                                                                                                                              |
| National Clinical Registries (RKKB):                |                                                                                                                                                                                                                                                                                                                                                                                                                                                                                                                                              |
| Danish Anesthesia Database                          | Information on blood pressure, height, weight, smoking, co-morbidity, ID, date, department, hospital, region, indication, operation information, complications, ASA score, and other related variables                                                                                                                                                                                                                                                                                                                                       |
| Danish Stroke Registry                              | Disease classification, information on smoking history, cardiac disease, comorbidity, ID, date, department, hospital, region, alcohol, AK treatment, diabetes, bleeding or infraction, hypertension, treatment, outcome, height, weight, and other related variables                                                                                                                                                                                                                                                                         |
| Danish Heart Registry                               | Disease classification, indication, operation type, left ventricular ejection fraction (LEVF), coronary artery pathology, height, weight, smoking, diabetes history, package, treatment, ID, date, department, hospital, region, complications, EURO score, lung disease, cerebrovascular disease, previous cardiac surgery, creatinine, endocarditis, pulmonal hypertension, angina, left ventricular dysfunction, and other related variables                                                                                              |
| Danish Heart Failure Registry                       | Disease classification, disease severity measures, co-morbidity, life style factors, treatments, ID, date, department, hospital, region alcohol, BMI, diabetes, hypertension, tobacco, ejection fraction, NYHA group, COPD, and other related variables                                                                                                                                                                                                                                                                                      |
| Danish Heart Disease Rehabilitation Database        | Disease classification, cardiovascular disease history, co-morbidity, LVEF, lifestyle factors, cardiac risk factors, current disease measures including CSS and NYHA classification, waist circumference, current treatment, current laboratory values, HRQoL score, ID, date, department, hospital, region, treatment, liver values, CK, BMI, depression, GFR, diabetes values, lung function, exercise test, blood pressure, blood sugar values incl. HbA1c, lipids, HRQL, ejection fraction, height, weight, and other related variables. |
| Danarrest and the Danish Registry of Cardiac Arrest | Cardiac cause of death, ID, date, department, hospital, region and similar data as for the other databases                                                                                                                                                                                                                                                                                                                                                                                                                                   |
| Atrial Fibrillation Database                        | Information on ID, date, department, hospital, region and similar data as for the other databases                                                                                                                                                                                                                                                                                                                                                                                                                                            |
| Danish Pacemaker and ICD register                   | Information on ID, date, department, hospital, region, devices, indication, and similar data as for the other databases                                                                                                                                                                                                                                                                                                                                                                                                                      |
| Danish Ablation Database                            | Information on ID, date, department, hospital, region, indication, conduction disorder, operation, and similar data as for the other databases                                                                                                                                                                                                                                                                                                                                                                                               |

|                                                       |                                                                                                                                                                                                                                                                                                        |
|-------------------------------------------------------|--------------------------------------------------------------------------------------------------------------------------------------------------------------------------------------------------------------------------------------------------------------------------------------------------------|
| The PATS Database                                     | Includes data on patients that has undergone invasive cardiac procedures until 2016 – we will include data on ID, date, department, hospital, region, indication, operation procedures, risk factors, laboratory values, co-morbidity and organ functions, and similar data as for the other databases |
| The Database for Familial Hypercholesterolemia        | Information on ID, date, department, hospital, region, indication, dyslipidemia disorder, genetics, and similar data as for the other databases                                                                                                                                                        |
| Progeny                                               | The database holds data on clinical and genetic findings in families with inherited cardiac diseases including pedigrees. Information on ID, date, department, hospital, region, indication for assessment, findings, and similar data as for the other databases                                      |
| Danish Obesity Surgery Database                       | Information on ID, date, department, hospital, region, diabetes, height, weight, diabetes type, hypertension, lipids, depression, asthma, COPD, PCO, joint complaints, tobacco, alcohol, HRQL, treatment, and other related variables                                                                  |
| Danish Registry for Chronic Obstructive Lung Diseases | Information on ID, date, department, hospital, region, BMI, co-morbidity, lung function measures, diagnosis, tobacco, tobacco intervention, and other related variables                                                                                                                                |
| Sleep Apnea Database                                  | Information on ID, date, department, hospital, region, diagnosis, treatment                                                                                                                                                                                                                            |
| KARBASE                                               | Information on ID, date, department, hospital, region, diagnosis, intervention, death, date of death, date of operation, co-morbidity, BMI, tobacco, alcohol, and other related variables                                                                                                              |

**Supplementary Table 8: P-values and confidence intervals of the effect sizes regression lines.**

| Phenotype  | Entire cohort with DBDS |            | CHB-CVDC as controls   |            | DBDS as controls       |            |
|------------|-------------------------|------------|------------------------|------------|------------------------|------------|
|            | p-value                 | 2.5%:97.5% | p-value                | 2.5%:97.5% | p-value                | 2.5%:97.5% |
| <b>CAD</b> | <2.2*10 <sup>-16</sup>  | 0.76:0.88  | <2.2*10 <sup>-16</sup> | 0.60:0.68  | <2.2*10 <sup>-16</sup> | 0.73:0.89  |
| <b>AF</b>  | <2.2*10 <sup>-16</sup>  | 0.65:0.83  | <2.2*10 <sup>-16</sup> | 0.56:0.72  | <2.2*10 <sup>-16</sup> | 0.52:0.69  |
| <b>HF</b>  | 0.01079                 | 0.14:0.83  | 0.0062                 | 0.17:0.80  | 0.0161                 | 0.13:1.01  |
| <b>HDL</b> | <2.2*10 <sup>-16</sup>  | 0.81:0.95  |                        |            |                        |            |
| <b>LDL</b> | <2.2*10 <sup>-16</sup>  | 0.61:0.70  |                        |            |                        |            |
| <b>TC</b>  | <2.2*10 <sup>-16</sup>  | 0.66:0.75  |                        |            |                        |            |
| <b>TG</b>  | <2.2*10 <sup>-16</sup>  | 0.88:1.1   |                        |            |                        |            |
| <b>SBP</b> | <2.2*10 <sup>-16</sup>  | 0.09:0.12  |                        |            |                        |            |
| <b>DBP</b> | <2.2*10 <sup>-16</sup>  | 0.13:0.18  |                        |            |                        |            |



**Supplementary Table 9: Comparison of different control groups**

| <b>Atrial Fibrillation</b>                                             |                                                     |                         |                                      |              |                 |
|------------------------------------------------------------------------|-----------------------------------------------------|-------------------------|--------------------------------------|--------------|-----------------|
|                                                                        | <b>Variants with concordant direction of effect</b> | <b>Replicated/Total</b> | <b>Replicated/Power to Replicate</b> | <b>Cases</b> | <b>Controls</b> |
| <b>CHB as cases, DBDS and CHB as controls. As presented in Table 2</b> | 137/140 (98%)                                       | 96/140 (69%)            | 96/109 (88%)                         | 30 229       | 157 669         |
| <b>CHB as cases and controls</b>                                       | 139/140 (99%)                                       | 83/140 (59%)            | 83/102 (81%)                         | 30 152       | 65 870          |
| <b>CHB as cases, DBDS as controls</b>                                  | 136/140 (97%)                                       | 30/140 (21%)            | 30/54 (56%)                          | 30 152       | 91 280          |
| <b>Coronary Artery Disease</b>                                         |                                                     |                         |                                      |              |                 |
|                                                                        | <b>Variants with concordant direction of effect</b> | <b>Replicated/Total</b> | <b>Replicated/Power to Replicate</b> | <b>Cases</b> | <b>Controls</b> |
| <b>CHB as cases, DBDS and CHB as controls. As presented in Table 2</b> | 236/241 (98%)                                       | 90/241 (37%)            | 90/137 (66%)                         | 33 746       | 154 311         |
| <b>CHB as cases and controls</b>                                       | 233/241 (97%)                                       | 71/241 (29%)            | 71/113 (63%)                         | 37 862       | 69 824          |
| <b>CHB as cases, DBDS as controls</b>                                  | 232/241 (96%)                                       | 35/241 (15%)            | 35/72 (49%)                          | 38 561       | 104 011         |
| <b>Heart Failure</b>                                                   |                                                     |                         |                                      |              |                 |
|                                                                        | <b>Variants with concordant direction of effect</b> | <b>Replicated/Total</b> | <b>Replicated/Power to Replicate</b> | <b>Cases</b> | <b>Controls</b> |
| <b>CHB as cases, DBDS and CHB as controls. As presented in Table 2</b> | 14/15 (93%)                                         | 9/15 (60%)              | 9/10 (90%)                           | 21 443       | 167 068         |
| <b>CHB as cases and controls</b>                                       | 14/15 (93%)                                         | 7/15 (47%)              | 7/9 (78%)                            | 21 421       | 74601           |
| <b>CHB as cases, DBDS as controls</b>                                  | 15/15 (100%)                                        | 5/15 (33%)              | 5/6 (83%)                            | 21 421       | 91892           |

**Supplementary Table 10: Residual confounding**

| Phenotype | Design                  | Intercept | Intercept SE | Ratio  |
|-----------|-------------------------|-----------|--------------|--------|
| AF        | Entire cohort with DBDS | 1,0957    | 0,0087       | 0,3366 |
| AF        | CHB-CVDC                | 1,0356    | 0,0079       | 0,1566 |
| AF        | DBDS control            | 1,1030    | 0,0088       | 0,5366 |
| CAD       | Entire cohort with DBDS | 1,1163    | 0,0092       | 0,3995 |
| CAD       | CHB-CVDC                | 1,0303    | 0,0085       | 0,1887 |
| CAD       | DBDS control            | 1,1638    | 0,0099       | 0,5091 |
| HF        | Entire cohort with DBDS | 1,0705    | 0,0073       | 0,5313 |
| HF        | CHB-CVDC                | 1,0203    | 0,0065       | 0,3414 |
| HF        | DBDS control            | 1,0977    | 0,0079       | 0,5709 |

**Supplementary Table 11: Genetic Correlation**

| Phenotype | Design                  | Comparison study  | rg      | se     | p         |
|-----------|-------------------------|-------------------|---------|--------|-----------|
| AF        | Entire cohort with DBDS | Nielsen 2018      | 1,0778  | 0,0417 | 2,76E-147 |
| AF        | CHB-CVDC                | Nielsen 2018      | 0,9647  | 0,035  | 1,83E-167 |
|           | CHB-CVDC case / DBDS    |                   |         |        |           |
| AF        | control                 | Nielsen 2018      | NA      | NA     | NA        |
| CAD       | Entire cohort with DBDS | Cardiogramplusc4d | 1,0452  | 0,0675 | 4,32E-54  |
| CAD       | CHB-CVDC                | Cardiogramplusc4d | 0,9249  | 0,0667 | 1,12E-43  |
|           | CHB-CVDC case / DBDS    |                   |         |        |           |
| CAD       | control                 | Cardiogramplusc4d | NA      | NA     | NA        |
| HF        | Entire cohort with DBDS | Shah 2020         | 0,9808  | 0,1027 | 1,26E-21  |
| HF        | CHB-CVDC                | Shah 2020         | -0,8248 | 0,1289 | 1,57E-10  |
|           | CHB-CVDC case / DBDS    |                   |         |        |           |
| HF        | control                 | Shah 2020         | NA      | NA     | NA        |

### Supplementary references

- 1 Gasparini A. comorbidity: An R package for computing comorbidity scores. *JOSS* 2018;**3**:648. doi:10.21105/joss.00648
- 2 Quan H, Sundararajan V, Halfon P, *et al.* Coding algorithms for defining comorbidities in ICD-9-CM and ICD-10 administrative data. *Med Care* 2005;**43**:1130–9. doi:10.1097/01.mlr.0000182534.19832.83
- 3 Schmidt M, Schmidt SAJ, Sandegaard JL, *et al.* The Danish National Patient Registry: a review of content, data quality, and research potential. *Clin Epidemiol* 2015;**7**:449–90. doi:10.2147/CLEP.S91125
- 4 Kildemoes HW, Sørensen HT, Hallas J. The Danish National Prescription Registry. *Scand J Public Health* 2011;**39**:38–41. doi:10.1177/1403494810394717
- 5 Hansen TF, Banasik K, Erikstrup C, *et al.* DBDS Genomic Cohort, a prospective and comprehensive resource for integrative and temporal analysis of genetic, environmental and lifestyle factors affecting health of blood donors. *BMJ Open* 2019;**9**:e028401. doi:10.1136/bmjopen-2018-028401
- 6 Aragam KG, Chaffin M, Levinson RT, *et al.* Phenotypic Refinement of Heart Failure in a National Biobank Facilitates Genetic Discovery. *Circulation* 2019;**139**:489–501. doi:10.1161/CIRCULATIONAHA.118.035774
- 7 Krogager ML, Torp-Pedersen C, Mortensen RN, *et al.* Short-term mortality risk of serum potassium levels in hypertension: a retrospective analysis of nationwide registry data. *Eur Heart J* 2017;**38**:104–12. doi:10.1093/eurheartj/ehw129
- 8 Machiela MJ, Chanock SJ. LDlink: a web-based application for exploring population-specific haplotype structure and linking correlated alleles of possible functional variants. *Bioinformatics* 2015;**31**:3555–7. doi:10.1093/bioinformatics/btv402
- 9 R Core Team. R: A Language and Environment for Statistical Computing. 2020. <https://www.R-project.org/>
- 10 Purcell S, Neale B, Todd-Brown K, *et al.* PLINK: a tool set for whole-genome association and population-based linkage analyses. *Am J Hum Genet* 2007;**81**:559–75. doi:10.1086/519795
- 11 Chang CC, Chow CC, Tellier LC, *et al.* Second-generation PLINK: rising to the challenge of larger and richer datasets. *Gigascience* 2015;**4**. doi:10.1186/s13742-015-0047-8
- 12 Zhou W, Nielsen JB, Fritsche LG, *et al.* Efficiently controlling for case-control imbalance and sample relatedness in large-scale genetic association studies. *Nat Genet* 2018;**50**:1335–41. doi:10.1038/s41588-018-0184-y
- 13 Loh P-R, Tucker G, Bulik-Sullivan BK, *et al.* Efficient Bayesian mixed-model analysis increases association power in large cohorts. *Nat Genet* 2015;**47**:284–90. doi:10.1038/ng.3190

- 14 Abraham G, Qiu Y, Inouye M. FlashPCA2: principal component analysis of Biobank-scale genotype datasets. *Bioinformatics* 2017;**33**:2776–8. doi:10.1093/bioinformatics/btx299
- 15 RStudio Team. RStudio: Integrated Development for R. 2020. <https://www.rstudio.com/>
- 16 Bulik-Sullivan BK, Loh P-R, Finucane H, *et al*. LD Score Regression Distinguishes Confounding from Polygenicity in Genome-Wide Association Studies. *Nat Genet* 2015;**47**:291–5. doi:10.1038/ng.3211
- 17 Buniello A, MacArthur JAL, Cerezo M, *et al*. The NHGRI-EBI GWAS Catalog of published genome-wide association studies, targeted arrays and summary statistics 2019. *Nucleic Acids Res* 2019;**47**:D1005–12. doi:10.1093/nar/gky1120
